# Supplementary material for: Regional Patterns and Association Between Obesity and Hypertension in Africa: Evidence From the H3Africa CHAIR Study
Source: PubMed Central journal article supplement (PMC7176339; doi:10.1161/hypertensionaha.119.14147), 2020-03-16
Supplement: hyp-75-1167-s004.pdf [file hyp-75-1167-s004.pdf]

## Change of Authorship Form

(Must be completed and signed by ALL authors)

Please check all that apply

\_\_\_\_ New author(s) have been added (in addition to this form, all new authors must complete the copyright transfer agreement and conflict of interest disclosure.

\_\_\_\_ Change in order of authorship.

\_\_\_\_ An author wishes to remove his/her name. An author's name may only be removed his/her own request and a letter signed by the author should accompany this form

**Manuscript Number** HYPE2019141

**Manuscript Title** Regional patterns and association between obesity and hypertension in Africa: E

### Former Authorship

Please list ALL AUTHORS in the same order as the original submission. For more than 12, use an extra sheet.

#### Print Name

Name (1) Onoja M. Akpa  
Name (2) Felix Made  
Name (3) Akinlolu Ojo  
Name (4) Bruce Ovbiagele  
Name (5) Dwomoa Adu  
Name (6) Ayesha A. Motala

#### Print Name

Name (7) Bongani M. Mayosi  
Name (8) Sally N. Adebamowo  
Name (9) Mark E. Engel  
Name (10) Charles Rotimi  
Name (11) Ken Wiley  
Name (12) Jennifer Troyer

### New Authorship

All authors must sign below agreeing to the changes in authorship. The authorship order must reflect the authorship order of the manuscript.

|                                    |                                                                                                      |                        |
|------------------------------------|------------------------------------------------------------------------------------------------------|------------------------|
| Name (1) <u>Onoja M. Akpa</u>      | Signature <u>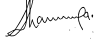</u> | Date <u>22/01/2020</u> |
| Name (2) <u>Felix Made</u>         | Signature <u>F. Made</u>                                                                             | Date <u>23/01/20</u>   |
| Name (3) <u>Akinlolu Ojo</u>       | Signature _____                                                                                      | Date _____             |
| Name (4) <u>Bruce Ovbiagele</u>    | Signature _____                                                                                      | Date _____             |
| Name (5) <u>Dwomoa Adu</u>         | Signature _____                                                                                      | Date _____             |
| Name (6) <u>Ayesha A. Motala</u>   | Signature _____                                                                                      | Date _____             |
| Name (7) <u>Bongani M. Mayosi</u>  | Signature <u>Deceased</u>                                                                            | Date _____             |
| Name (8) <u>Sally N. Adebamowo</u> | Signature _____                                                                                      | Date _____             |
| Name (9) <u>Mark E. Engel</u>      | Signature _____                                                                                      | Date _____             |
| Name (10) <u>Bamidele Tayo</u>     | Signature <u>Bamidele Tayo</u>                                                                       | Date <u>23-Jan-20</u>  |
| Name (11) <u>Charles Rotimi</u>    | Signature _____                                                                                      | Date _____             |
| Name (12) <u>Babatunde Salako</u>  | Signature _____                                                                                      | Date _____             |

Please print form and fax to 214-706-1565.

## Change of Authorship Form

(Must be completed and signed by ALL authors)

Please check all that apply

\_\_\_\_\_ New author(s) have been added (in addition to this form, all new authors must complete the copyright transfer agreement and conflict of interest disclosure.

\_\_\_\_\_ Change in order of authorship.

\_\_\_\_\_ An author wishes to remove his/her name. An author's name may only be removed his/her own request and a letter signed by the author should accompany this form

Manuscript Number HYPE2019141

Manuscript Title Regional patterns and association between obesity and hypertension in Africa: E

### Former Authorship

Please list ALL AUTHORS in the same order as the original submission. For more than 12, use an extra sheet.

#### Print Name

Name (1) Onoja M. Akpa  
Name (2) Felix Made  
Name (3) Akinlolu Ojo  
Name (4) Bruce Ovbiagele  
Name (5) Dwomoa Adu  
Name (6) Ayesha A. Motala

#### Print Name

Name (7) Bongani M. Mayosi  
Name (8) Sally N. Adebamowo  
Name (9) Mark E. Engel  
Name (10) Charles Rotimi  
Name (11) Ken Wiley  
Name (12) Jennifer Troyer

### New Authorship

All authors must sign below agreeing to the changes in authorship. The authorship order must reflect the authorship order of the manuscript.

|                                    |                                 |                        |
|------------------------------------|---------------------------------|------------------------|
| Name (1) <u>Onoja M. Akpa</u>      | Signature _____                 | Date <u>22/01/2020</u> |
| Name (2) <u>Felix Made</u>         | Signature _____                 | Date <u>23/01/20</u>   |
| Name (3) <u>Akinlolu Ojo</u>       | Signature <u>Akinlolu Ojo</u>   | Date <u>28/01/2020</u> |
| Name (4) <u>Bruce Ovbiagele</u>    | Signature _____                 | Date _____             |
| Name (5) <u>Dwomoa Adu</u>         | Signature <u>dwomoaadu</u>      | Date <u>27/01/2020</u> |
| Name (6) <u>Ayesha A. Motala</u>   | Signature _____                 | Date _____             |
| Name (7) <u>Bongani M. Mayosi</u>  | Signature _____                 | Date _____             |
| Name (8) <u>Sally N. Adebamowo</u> | Signature _____                 | Date _____             |
| Name (9) <u>Mark E. Engel</u>      | Signature _____                 | Date _____             |
| Name (10) <u>Bamidele Tayo</u>     | Signature _____                 | Date _____             |
| Name (11) <u>Charles Rotimi</u>    | Signature <u>Charles Rotimi</u> | Date _____             |
| Name (12) <u>Babatunde Salako</u>  | Signature _____                 | Date _____             |

Please print form and fax to 214-706-1565.

## Change of Authorship Form

(Must be completed and signed by ALL authors)

Please check all that apply

\_\_\_\_\_ New author(s) have been added (in addition to this form, all new authors must complete the copyright transfer agreement and conflict of interest disclosure.

\_\_\_\_\_ Change in order of authorship.

\_\_\_\_\_ An author wishes to remove his/her name. An author's name may only be removed his/her own request and a letter signed by the author should accompany this form

Manuscript Number HYPE2019141

Manuscript Title Regional patterns and association between obesity and hypertension in Africa: E

### Former Authorship

Please list ALL AUTHORS in the same order as the original submission. For more than 12, use an extra sheet.

#### Print Name

Name (1) Onoja M. Akpa  
Name (2) Felix Made  
Name (3) Akinlolu Ojo  
Name (4) Bruce Ovbiagele  
Name (5) Dwomoa Adu  
Name (6) Ayesha A. Motala

#### Print Name

Name (7) Bongani M. Mayosi  
Name (8) Sally N. Adebamowo  
Name (9) Mark E. Engel  
Name (10) Charles Rotimi  
Name (11) Ken Wiley  
Name (12) Jennifer Troyer

### New Authorship

All authors must sign below agreeing to the changes in authorship. The authorship order must reflect the authorship order of the manuscript.

|                                    |                                                                                               |                        |
|------------------------------------|-----------------------------------------------------------------------------------------------|------------------------|
| Name (1) <u>Onoja M. Akpa</u>      | Signature _____                                                                               | Date <u>22/01/2020</u> |
| Name (2) <u>Felix Made</u>         | Signature <u>F. Made</u>                                                                      | Date <u>23/01/20</u>   |
| Name (3) <u>Akinlolu Ojo</u>       | Signature _____                                                                               | Date _____             |
| Name (4) <u>Bruce Ovbiagele</u>    | Signature <u>B.Ovbiagele</u>                                                                  | Date <u>24/01/20</u>   |
| Name (5) <u>Dwomoa Adu</u>         | Signature _____                                                                               | Date _____             |
| Name (6) <u>Ayesha A. Motala</u>   | Signature 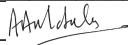 | Date <u>24/01/20</u>   |
| Name (7) <u>Bongani M. Mayosi</u>  | Signature <u>Deceased</u>                                                                     | Date _____             |
| Name (8) <u>Sally N. Adebamowo</u> | Signature _____                                                                               | Date _____             |
| Name (9) <u>Mark E. Engel</u>      | Signature _____                                                                               | Date _____             |
| Name (10) <u>Bamidele Tayo</u>     | Signature _____                                                                               | Date _____             |
| Name (11) <u>Charles Rotimi</u>    | Signature _____                                                                               | Date _____             |
| Name (12) <u>Babatunde Salako</u>  | Signature _____                                                                               | Date _____             |

Please print form and fax to 214-706-1565.

## Change of Authorship Form

(Must be completed and signed by ALL authors)

Please check all that apply

New author(s) have been added (in addition to this form, all new authors must complete the copyright transfer agreement and conflict of interest disclosure.

Change in order of authorship.

An author wishes to remove his/her name. An author's name may only be removed his/her own request and a letter signed by the author should accompany this form

Manuscript Number HYPE2019141

Manuscript Title Regional patterns and association between obesity and hypertension in Africa: E

### Former Authorship

Please list ALL AUTHORS in the same order as the original submission. For more than 12, use an extra sheet.

#### Print Name

Name (1) Onoja M. Akpa  
Name (2) Felix Made  
Name (3) Akinlolu Ojo  
Name (4) Bruce Ovbiagele  
Name (5) Dwomoa Adu  
Name (6) Ayesha A. Motala

#### Print Name

Name (7) Bongani M. Mayosi  
Name (8) Sally N. Adebamowo  
Name (9) Mark E. Engel  
Name (10) Charles Rotimi  
Name (11) Ken Wiley  
Name (12) Jennifer Troyer

### New Authorship

All authors must sign below agreeing to the changes in authorship. The authorship order must reflect the authorship order of the manuscript.

|                                    |                              |                        |
|------------------------------------|------------------------------|------------------------|
| Name (1) <u>Onoja M. Akpa</u>      | Signature _____              | Date <u>22/01/2020</u> |
| Name (2) <u>Felix Made</u>         | Signature <u>F. Made</u>     | Date <u>23/01/20</u>   |
| Name (3) <u>Akinlolu Ojo</u>       | Signature _____              | Date _____             |
| Name (4) <u>Bruce Ovbiagele</u>    | Signature <u>B.Ovbiagele</u> | Date <u>24/01/20</u>   |
| Name (5) <u>Dwomoa Adu</u>         | Signature _____              | Date _____             |
| Name (6) <u>Ayesha A. Motala</u>   | Signature <u>A.Motala</u>    | Date <u>24/01/20</u>   |
| Name (7) <u>Bongani M. Mayosi</u>  | Signature <u>Deceased</u>    | Date _____             |
| Name (8) <u>Sally N. Adebamowo</u> | Signature _____              | Date _____             |
| Name (9) <u>Mark E. Engel</u>      | Signature <u>M. Engel</u>    | Date <u>28/01/2020</u> |
| Name (10) <u>Bamidele Tayo</u>     | Signature _____              | Date _____             |
| Name (11) <u>Charles Rotimi</u>    | Signature _____              | Date _____             |
| Name (12) <u>Babatunde Salako</u>  | Signature <u>B. Salako</u>   | Date <u>28/01/2020</u> |

Please print form and fax to 214-706-1565.

## Change of Authorship Form

(Must be completed and signed by ALL authors)

Please check all that apply

New author(s) have been added (in addition to this form, all new authors must complete the copyright transfer agreement and conflict of interest disclosure.

Change in order of authorship.

An author wishes to remove his/her name. An author's name may only be removed his/her own request and a letter signed by the author should accompany this form

HYPE201914147-T1

Manuscript Number \_\_\_\_\_

Regional patterns and association between obesity and hypertension in Africa: Evidence from the H3Africa CHAIR study

Manuscript Title \_\_\_\_\_

### Former Authorship

Please list ALL AUTHORS in the same order as the original submission. For more than 12, use an extra sheet.

#### Print Name

Name (1) Onoja M. Akpa  
Name (2) Felix Made  
Name (3) Akinlolu Ojo  
Name (4) Bruce Ovbiagele  
Name (5) Dwomoa Adu  
Name (6) Ayesha A. Motala

#### Print Name

Name (7) Bongani M. Mayosi  
Name (8) Sally N. Adebamowo  
Name (9) Mark E. Engel  
Name (10) Charles Rotimi  
Name (11) Ken Wiley  
Name (12) Jennifer Troyer

### New Authorship

All authors must sign below agreeing to the changes in authorship. The authorship order must reflect the authorship order of the manuscript.

|           |                           |           |                           |      |                   |
|-----------|---------------------------|-----------|---------------------------|------|-------------------|
| Name (1)  | <u>Onoja M. Akpa</u>      | Signature | <u>O.M. Akpa</u>          | Date | <u>22/01/20</u>   |
| Name (2)  | <u>Felix Made</u>         | Signature | <u>F. Made</u>            | Date | <u>23/01/20</u>   |
| Name (3)  | <u>Akinlolu Ojo</u>       | Signature |                           | Date |                   |
| Name (4)  | <u>Bruce Ovbiagele</u>    | Signature |                           | Date |                   |
| Name (5)  | <u>Dwomoa Adu</u>         | Signature |                           | Date |                   |
| Name (6)  | <u>Ayesha A. Motala</u>   | Signature |                           | Date |                   |
| Name (7)  | <u>Bongani M. Mayosi</u>  | Signature | <u>Deceased</u>           | Date |                   |
| Name (8)  | <u>Sally N. Adebamowo</u> | Signature | <u>Sally N. Adebamowo</u> | Date | <u>01/24/2020</u> |
| Name (9)  | <u>Mark E. Engel</u>      | Signature |                           | Date |                   |
| Name (10) | <u>Bamidele Tayo</u>      | Signature |                           | Date |                   |
| Name (11) | <u>Charles Rotimi</u>     | Signature |                           | Date |                   |
| Name (12) | <u>Babatunde Salako</u>   | Signature |                           | Date |                   |

Please print form and fax to 214-706-1565.

## Change of Authorship Form

(Must be completed and signed by ALL authors)

Please check all that apply

New author(s) have been added (in addition to this form, all new authors must complete the copyright transfer agreement and conflict of interest disclosure.

Change in order of authorship.

An author wishes to remove his/her name. An author's name may only be removed his/her own request and a letter signed by the author should accompany this form

Manuscript Number HYPE2019141

Manuscript Title Regional patterns and association between obesity and hypertension in Africa: E

### Former Authorship

Please list ALL AUTHORS in the same order as the original submission. For more than 12, use an extra sheet.

#### Print Name

Name (1) Michèle Ramsay  
Name (2) Mayowa O. Owolabi  
Name (3) \_\_\_\_\_  
Name (4) \_\_\_\_\_  
Name (5) \_\_\_\_\_  
Name (6) \_\_\_\_\_

#### Print Name

Name (7) \_\_\_\_\_  
Name (8) \_\_\_\_\_  
Name (9) \_\_\_\_\_  
Name (10) \_\_\_\_\_  
Name (11) \_\_\_\_\_  
Name (12) \_\_\_\_\_

### New Authorship

All authors must sign below agreeing to the changes in authorship. The authorship order must reflect the authorship order of the manuscript.

|                                        |                                   |                        |
|----------------------------------------|-----------------------------------|------------------------|
| Name (1) <u>Rufus Akinyemi</u>         | Signature _____                   | Date _____             |
| Name (2) <u>Mulugeta Gebregziabher</u> | Signature <u>M. Gebregziabher</u> | Date <u>24/01/20</u>   |
| Name (3) <u>Fred Sarfo</u>             | Signature <u>FSSarfo</u>          | Date <u>25/01/2020</u> |
| Name (4) <u>Kolawole Wahab</u>         | Signature _____                   | Date _____             |
| Name (5) <u>Godfred Agongo</u>         | Signature <u>Godfred Aagongo</u>  | Date <u>24/01/20</u>   |
| Name (6) <u>Marianne Alberts</u>       | Signature _____                   | Date _____             |
| Name (7) <u>Stuart Ali</u>             | Signature _____                   | Date _____             |
| Name (8) <u>Gershim Asiki</u>          | Signature <u>[Signature]</u>      | Date <u>28/01/2020</u> |
| Name (9) <u>Romuald Boua</u>           | Signature _____                   | Date _____             |
| Name (10) <u>F Xavier Gómez-Olivé,</u> | Signature _____                   | Date _____             |
| Name (11) <u>Felistas Mashinya</u>     | Signature _____                   | Date _____             |
| Name (12) <u>Lisa Micklesfield</u>     | Signature <u>[Signature]</u>      | Date <u>24-01-20</u>   |

Please print form and fax to 214-706-1565.



## Change of Authorship Form

(Must be completed and signed by ALL authors)

Please check all that apply

New author(s) have been added (in addition to this form, all new authors must complete the copyright transfer agreement and conflict of interest disclosure.

Change in order of authorship.

An author wishes to remove his/her name. An author's name may only be removed his/her own request and a letter signed by the author should accompany this form

Manuscript Number HYPE2019141

Manuscript Title Regional patterns and association between obesity and hypertension in Africa: E

### Former Authorship

Please list ALL AUTHORS in the same order as the original submission. For more than 12, use an extra sheet.

#### Print Name

Name (1) Michèle Ramsay  
Name (2) Mayowa O. Owolabi  
Name (3) \_\_\_\_\_  
Name (4) \_\_\_\_\_  
Name (5) \_\_\_\_\_  
Name (6) \_\_\_\_\_

#### Print Name

Name (7) \_\_\_\_\_  
Name (8) \_\_\_\_\_  
Name (9) \_\_\_\_\_  
Name (10) \_\_\_\_\_  
Name (11) \_\_\_\_\_  
Name (12) \_\_\_\_\_

### New Authorship

All authors must sign below agreeing to the changes in authorship. The authorship order must reflect the authorship order of the manuscript.

|                                        |                                                                                                |            |
|----------------------------------------|------------------------------------------------------------------------------------------------|------------|
| Name (1) <u>Rufus Akinyemi</u>         | Signature _____                                                                                | Date _____ |
| Name (2) <u>Mulugeta Gebregziabher</u> | Signature _____                                                                                | Date _____ |
| Name (3) <u>Fred Sarfo</u>             | Signature _____                                                                                | Date _____ |
| Name (4) <u>Kolawole Wahab</u>         | Signature _____                                                                                | Date _____ |
| Name (5) <u>Godfred Agongo</u>         | Signature _____                                                                                | Date _____ |
| Name (6) <u>Marianne Alberts</u>       | Signature 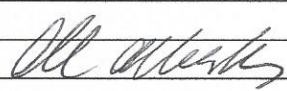 | Date _____ |
| Name (7) <u>Stuart Ali</u>             | Signature _____                                                                                | Date _____ |
| Name (8) <u>Gershim Asiki</u>          | Signature _____                                                                                | Date _____ |
| Name (9) <u>Romuald Boua</u>           | Signature _____                                                                                | Date _____ |
| Name (10) <u>F Xavier Gómez-Olivé,</u> | Signature _____                                                                                | Date _____ |
| Name (11) <u>Felistas Mashinya</u>     | Signature _____                                                                                | Date _____ |
| Name (12) <u>Lisa Micklesfield</u>     | Signature _____                                                                                | Date _____ |

Please print form and fax to 214-706-1565.

## Change of Authorship Form

---

(Must be completed and signed by ALL authors)

Please check all that apply

New author(s) have been added (in addition to this form, all new authors must complete the copyright transfer agreement and conflict of interest disclosure.

Change in order of authorship.

An author wishes to remove his/her name. An author's name may only be removed his/her own request and a letter signed by the author should accompany this form

HYPE2019141

Manuscript Number \_\_\_\_\_

Manuscript Title Regional patterns and association between obesity and hypertension in Africa: E

### Former Authorship

Please list ALL AUTHORS in the same order as the original submission. For more than 12, use an extra sheet.

#### Print Name

Name (1) Michèle Ramsay  
Name (2) Mayowa O. Owolabi  
Name (3) \_\_\_\_\_  
Name (4) \_\_\_\_\_  
Name (5) \_\_\_\_\_  
Name (6) \_\_\_\_\_

#### Print Name

Name (7) \_\_\_\_\_  
Name (8) \_\_\_\_\_  
Name (9) \_\_\_\_\_  
Name (10) \_\_\_\_\_  
Name (11) \_\_\_\_\_  
Name (12) \_\_\_\_\_

### New Authorship

All authors must sign below agreeing to the changes in authorship. The authorship order must reflect the authorship order of the manuscript.

|                                        |                              |                        |
|----------------------------------------|------------------------------|------------------------|
| Name (1) <u>Rufus Akinyemi</u>         | Signature _____              | Date _____             |
| Name (2) <u>Mulugeta Gebregziabher</u> | Signature _____              | Date _____             |
| Name (3) <u>Fred Sarfo</u>             | Signature _____              | Date _____             |
| Name (4) <u>Kolawole Wahab</u>         | Signature _____              | Date _____             |
| Name (5) <u>Godfred Agongo</u>         | Signature _____              | Date _____             |
| Name (6) <u>Marianne Alberts</u>       | Signature _____              | Date _____             |
| Name (7) <u>Stuart Ali</u>             | Signature _____              | Date _____             |
| Name (8) <u>Gershim Asiki</u>          | Signature _____              | Date _____             |
| Name (9) <u>Romuald Boua</u>           | Signature _____              | Date _____             |
| Name (10) <u>F Xavier Gómez-Olivé,</u> | Signature _____              | Date _____             |
| Name (11) <u>Felistas Mashinya</u>     | Signature <u>F. Mashinya</u> | Date <u>24/01/2020</u> |
| Name (12) <u>Lisa Micklesfield</u>     | Signature _____              | Date _____             |

Please print form and fax to 214-706-1565.



## Change of Authorship Form

---

(Must be completed and signed by ALL authors)

Please check all that apply

\_\_\_\_\_ New author(s) have been added (in addition to this form, all new authors must complete the copyright transfer agreement and conflict of interest disclosure.

\_\_\_\_\_ Change in order of authorship.

\_\_\_\_\_ An author wishes to remove his/her name. An author's name may only be removed his/her own request and a letter signed by the author should accompany this form

Manuscript Number HYPE2019141

Manuscript Title Regional patterns and association between obesity and hypertension in Africa: E

### Former Authorship

Please list ALL AUTHORS in the same order as the original submission. For more than 12, use an extra sheet.

#### Print Name

Name (1) Michèle Ramsay  
Name (2) Mayowa O. Owolabi  
Name (3) \_\_\_\_\_  
Name (4) \_\_\_\_\_  
Name (5) \_\_\_\_\_  
Name (6) \_\_\_\_\_

#### Print Name

Name (7) \_\_\_\_\_  
Name (8) \_\_\_\_\_  
Name (9) \_\_\_\_\_  
Name (10) \_\_\_\_\_  
Name (11) \_\_\_\_\_  
Name (12) \_\_\_\_\_

### New Authorship

All authors must sign below agreeing to the changes in authorship. The authorship order must reflect the authorship order of the manuscript.

|                                        |                                        |                        |
|----------------------------------------|----------------------------------------|------------------------|
| Name (1) <u>Rufus Akinyemi</u>         | Signature _____                        | Date _____             |
| Name (2) <u>Mulugeta Gebregziabher</u> | Signature <u>M. Gebregziabher</u>      | Date _____             |
| Name (3) <u>Fred Sarfo</u>             | Signature _____                        | Date _____             |
| Name (4) <u>Kolawole Wahab</u>         | Signature _____                        | Date _____             |
| Name (5) <u>Godfred Agongo</u>         | Signature _____                        | Date _____             |
| Name (6) <u>Marianne Alberts</u>       | Signature _____                        | Date _____             |
| Name (7) <u>Stuart Ali</u>             | Signature _____                        | Date _____             |
| Name (8) <u>Gershim Asiki</u>          | Signature _____                        | Date _____             |
| Name (9) <u>Romuald Boua</u>           | Signature <u>BOUA Palwendé Romuald</u> | Date <u>24Jan 2020</u> |
| Name (10) <u>F Xavier Gómez-Olivé,</u> | Signature _____                        | Date _____             |
| Name (11) <u>Felistas Mashinya</u>     | Signature _____                        | Date _____             |
| Name (12) <u>Lisa Micklesfield</u>     | Signature _____                        | Date _____             |

Please print form and fax to 214-706-1565.

## Change of Authorship Form

(Must be completed and signed by ALL authors)

Please check all that apply

\_\_\_\_\_ New author(s) have been added (in addition to this form, all new authors must complete the copyright transfer agreement and conflict of interest disclosure.

\_\_\_\_\_ Change in order of authorship.

\_\_\_\_\_ An author wishes to remove his/her name. An author's name may only be removed his/her own request and a letter signed by the author should accompany this form

HYPE201914147-T1

Manuscript Number \_\_\_\_\_

Regional patterns and association between obesity and hypertension in Africa: Evidence from the H3Africa CHAIR study

Manuscript Title \_\_\_\_\_

### Former Authorship

Please list ALL AUTHORS in the same order as the original submission. For more than 12, use an extra sheet.

#### Print Name

Name (1) Michèle Ramsay  
Name (2) Mayowa O. Owolabi  
Name (3) \_\_\_\_\_  
Name (4) \_\_\_\_\_  
Name (5) \_\_\_\_\_  
Name (6) \_\_\_\_\_

#### Print Name

Name (7) \_\_\_\_\_  
Name (8) \_\_\_\_\_  
Name (9) \_\_\_\_\_  
Name (10) \_\_\_\_\_  
Name (11) \_\_\_\_\_  
Name (12) \_\_\_\_\_

### New Authorship

All authors must sign below agreeing to the changes in authorship. The authorship order must reflect the authorship order of the manuscript.

|           |                               |           |                                                                                      |      |                        |
|-----------|-------------------------------|-----------|--------------------------------------------------------------------------------------|------|------------------------|
| Name (1)  | <u>Rufus Akinyemi</u>         | Signature | <u>RufusAkinyemi</u>                                                                 | Date | <u>25/01/20</u>        |
| Name (2)  | <u>Mulugeta Gebregziabher</u> | Signature | _____                                                                                | Date | _____                  |
| Name (3)  | <u>Fred Sarfo</u>             | Signature | _____                                                                                | Date | _____                  |
| Name (4)  | <u>Kolawole Wahab</u>         | Signature | <u>K.Wahab</u>                                                                       | Date | <u>28/01/20</u>        |
| Name (5)  | <u>Godfred Agongo</u>         | Signature | _____                                                                                | Date | _____                  |
| Name (6)  | <u>Marianne Alberts</u>       | Signature | _____                                                                                | Date | _____                  |
| Name (7)  | <u>Stuart Ali</u>             | Signature | <u>StuartAli</u>                                                                     | Date | <u>27/01/2020</u>      |
| Name (8)  | <u>Gershim Asiki</u>          | Signature | _____                                                                                | Date | _____                  |
| Name (9)  | <u>Romuald Boua</u>           | Signature | _____                                                                                | Date | _____                  |
| Name (10) | <u>F Xavier Gómez-Olivé,</u>  | Signature |  | Date | <u>24 January 2020</u> |
| Name (11) | <u>Felistas Mashinya</u>      | Signature | _____                                                                                | Date | _____                  |
| Name (12) | <u>Lisa Micklesfield</u>      | Signature | _____                                                                                | Date | _____                  |

Please print form and fax to 214-706-1565.

## Change of Authorship Form

---

(Must be completed and signed by ALL authors)

Please check all that apply

\_\_\_\_\_ New author(s) have been added (in addition to this form, all new authors must complete the copyright transfer agreement and conflict of interest disclosure.

\_\_\_\_\_ Change in order of authorship.

\_\_\_\_\_ An author wishes to remove his/her name. An author's name may only be removed his/her own request and a letter signed by the author should accompany this form

Manuscript Number HYPE2019141

Manuscript Title Regional patterns and association between obesity and hypertension in Africa: I

### Former Authorship

Please list ALL AUTHORS in the same order as the original submission. For more than 12, use an extra sheet.

#### Print Name

Name (1) \_\_\_\_\_  
Name (2) \_\_\_\_\_  
Name (3) \_\_\_\_\_  
Name (4) \_\_\_\_\_  
Name (5) \_\_\_\_\_  
Name (6) \_\_\_\_\_

#### Print Name

Name (7) \_\_\_\_\_  
Name (8) \_\_\_\_\_  
Name (9) \_\_\_\_\_  
Name (10) \_\_\_\_\_  
Name (11) \_\_\_\_\_  
Name (12) \_\_\_\_\_

### New Authorship

All authors must sign below agreeing to the changes in authorship. The authorship order must reflect the authorship order of the manuscript.

|                                    |                            |                        |
|------------------------------------|----------------------------|------------------------|
| Name (1) <u>Shukri Mohamed</u>     | Signature _____            | Date _____             |
| Name (2) <u>Engelbert Nonterah</u> | Signature _____            | Date _____             |
| Name (3) <u>Shane Norris</u>       | Signature _____            | Date _____             |
| Name (4) <u>Hermann Sorgho</u>     | Signature <u>H. Sorgho</u> | Date <u>24/01/2020</u> |
| Name (5) <u>Stephen Tollman,</u>   | Signature _____            | Date _____             |
| Name (6) <u>Rulan Parekh</u>       | Signature _____            | Date _____             |
| Name (7) <u>Chisala Chisala</u>    | Signature _____            | Date _____             |
| Name (8) <u>Kenneth Ekoru</u>      | Signature _____            | Date _____             |
| Name (9) <u>Salina P. Waddy</u>    | Signature _____            | Date _____             |
| Name (10) <u>Emmanuel Peprah</u>   | Signature _____            | Date _____             |
| Name (11) <u>George A. Mensah</u>  | Signature _____            | Date _____             |
| Name (12) <u>Ken Wiley</u>         | Signature _____            | Date _____             |

Please print form and fax to 214-706-1565.

## Change of Authorship Form

(Must be completed and signed by ALL authors)

Please check all that apply

\_\_\_\_\_ New author(s) have been added (in addition to this form, all new authors must complete the copyright transfer agreement and conflict of interest disclosure.

\_\_\_\_\_ Change in order of authorship.

\_\_\_\_\_ An author wishes to remove his/her name. An author's name may only be removed his/her own request and a letter signed by the author should accompany this form

**Manuscript Number** HYPE2019141

**Manuscript Title** Regional patterns and association between obesity and hypertension in Africa: E

### Former Authorship

Please list ALL AUTHORS in the same order as the original submission. For more than 12, use an extra sheet.

#### Print Name

Name (1) \_\_\_\_\_  
Name (2) \_\_\_\_\_  
Name (3) \_\_\_\_\_  
Name (4) \_\_\_\_\_  
Name (5) \_\_\_\_\_  
Name (6) \_\_\_\_\_

#### Print Name

Name (7) \_\_\_\_\_  
Name (8) \_\_\_\_\_  
Name (9) \_\_\_\_\_  
Name (10) \_\_\_\_\_  
Name (11) \_\_\_\_\_  
Name (12) \_\_\_\_\_

### New Authorship

All authors must sign below agreeing to the changes in authorship. The authorship order must reflect the authorship order of the manuscript.

|                                    |                                         |                       |
|------------------------------------|-----------------------------------------|-----------------------|
| Name (1) <u>Shukri Mohamed</u>     | Signature <u>Shukri Mohamed</u>         | Date <u>24/01/20</u>  |
| Name (2) <u>Engelbert Nonterah</u> | Signature _____                         | Date _____            |
| Name (3) <u>Shane Norris</u>       | Signature _____                         | Date _____            |
| Name (4) <u>Hermann Sorgho</u>     | Signature _____                         | Date _____            |
| Name (5) <u>Stephen Tollman,</u>   | Signature _____                         | Date _____            |
| Name (6) <u>Rulan Parekh</u>       | Signature _____                         | Date _____            |
| Name (7) <u>Chishala Chishala</u>  | Signature _____                         | Date _____            |
| Name (8) <u>Kenneth Ekoru</u>      | Signature _____                         | Date _____            |
| Name (9) <u>Salina P. Waddy</u>    | Signature _____                         | Date _____            |
| Name (10) <u>Emmanuel Peprah</u>   | Signature _____                         | Date _____            |
| Name (11) <u>George A. Mensah</u>  | Signature _____                         | Date _____            |
| Name (12) <u>Ken Wiley</u>         | Signature <u>Kenneth L. Wiley Jr -S</u> | Date <u>1/23/2020</u> |

Please print form and fax to 214-706-1565.

## Change of Authorship Form

(Must be completed and signed by ALL authors)

Please check all that apply

New author(s) have been added (in addition to this form, all new authors must complete the copyright transfer agreement and conflict of interest disclosure.

Change in order of authorship.

An author wishes to remove his/her name. An author's name may only be removed his/her own request and a letter signed by the author should accompany this form

Manuscript Number HYPE2019141

Manuscript Title Regional patterns and association between obesity and hypertension in Africa: E

### Former Authorship

Please list ALL AUTHORS in the same order as the original submission. For more than 12, use an extra sheet.

#### Print Name

Name (1) \_\_\_\_\_  
 Name (2) \_\_\_\_\_  
 Name (3) \_\_\_\_\_  
 Name (4) \_\_\_\_\_  
 Name (5) \_\_\_\_\_  
 Name (6) \_\_\_\_\_

#### Print Name

Name (7) \_\_\_\_\_  
 Name (8) \_\_\_\_\_  
 Name (9) \_\_\_\_\_  
 Name (10) \_\_\_\_\_  
 Name (11) \_\_\_\_\_  
 Name (12) \_\_\_\_\_

### New Authorship

All authors must sign below agreeing to the changes in authorship. The authorship order must reflect the authorship order of the manuscript.

| Name                               | Signature                                                                                             | Text | Date                     |
|------------------------------------|-------------------------------------------------------------------------------------------------------|------|--------------------------|
| Name (1) <u>Shukri Mohamed</u>     | Signature _____                                                                                       |      | Date _____               |
| Name (2) <u>Engelbert Nonterah</u> | Signature _____                                                                                       |      | Date _____               |
| Name (3) <u>Shane Norris</u>       | Signature _____                                                                                       |      | Date _____               |
| Name (4) <u>Hermann Sorgho</u>     | Signature _____                                                                                       |      | Date _____               |
| Name (5) <u>Stephen Tollman,</u>   | Signature <u>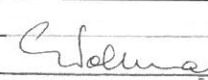</u> |      | Date <u>24. 01. 2020</u> |
| Name (6) <u>Rulan Parekh</u>       | Signature _____                                                                                       |      | Date _____               |
| Name (7) <u>Chisala Chisala</u>    | Signature _____                                                                                       |      | Date _____               |
| Name (8) <u>Kenneth Ekoru</u>      | Signature _____                                                                                       |      | Date _____               |
| Name (9) <u>Salina P. Waddy</u>    | Signature _____                                                                                       |      | Date _____               |
| Name (10) <u>Emmanuel Peprah</u>   | Signature _____                                                                                       |      | Date _____               |
| Name (11) <u>George A. Mensah</u>  | Signature _____                                                                                       |      | Date _____               |
| Name (12) <u>Ken Wiley</u>         | Signature _____                                                                                       |      | Date _____               |

Please print form and fax to 214-706-1565.



## Change of Authorship Form

---

(Must be completed and signed by ALL authors)

Please check all that apply

\_\_\_\_\_ New author(s) have been added (in addition to this form, all new authors must complete the copyright transfer agreement and conflict of interest disclosure.

\_\_\_\_\_ Change in order of authorship.

\_\_\_\_\_ An author wishes to remove his/her name. An author's name may only be removed his/her own request and a letter signed by the author should accompany this form

**Manuscript Number** HYPE2019141

**Manuscript Title** Regional patterns and association between obesity and hypertension in Africa: E

### Former Authorship

Please list ALL AUTHORS in the same order as the original submission. For more than 12, use an extra sheet.

#### Print Name

Name (1) \_\_\_\_\_  
Name (2) \_\_\_\_\_  
Name (3) \_\_\_\_\_  
Name (4) \_\_\_\_\_  
Name (5) \_\_\_\_\_  
Name (6) \_\_\_\_\_

#### Print Name

Name (7) \_\_\_\_\_  
Name (8) \_\_\_\_\_  
Name (9) \_\_\_\_\_  
Name (10) \_\_\_\_\_  
Name (11) \_\_\_\_\_  
Name (12) \_\_\_\_\_

### New Authorship

All authors must sign below agreeing to the changes in authorship. The authorship order must reflect the authorship order of the manuscript.

|                                    |                                                                                                                                      |                        |
|------------------------------------|--------------------------------------------------------------------------------------------------------------------------------------|------------------------|
| Name (1) <u>Shukri Mohamed</u>     | Signature _____                                                                                                                      | Date _____             |
| Name (2) <u>Engelbert Nonterah</u> | Signature _____                                                                                                                      | Date _____             |
| Name (3) <u>Shane Norris</u>       | Signature _____                                                                                                                      | Date _____             |
| Name (4) <u>Hermann Sorgho</u>     | Signature _____                                                                                                                      | Date _____             |
| Name (5) <u>Stephen Tollman,</u>   | Signature _____                                                                                                                      | Date _____             |
| Name (6) <u>Rulan Parekh</u>       | Signature _____                                                                                                                      | Date _____             |
| Name (7) <u>Chisala Chisala</u>    | Signature _____                                                                                                                      | Date _____             |
| Name (8) <u>Kenneth Ekoru</u>      | Signature _____                                                                                                                      | Date _____             |
| Name (9) <u>Salina P. Waddy</u>    | Signature _____                                                                                                                      | Date _____             |
| Name (10) <u>Emmanuel Peprah</u>   | Signature _____                                                                                                                      | Date _____             |
| Name (11) <u>George A. Mensah</u>  | Signature <u>George A. Mensah -S</u><br><small>Digitally signed by George A. Mensah -S<br/>Date: 2020.01.23 23:10:41 -05'00'</small> | Date <u>01/23/2020</u> |
| Name (12) <u>Ken Wiley</u>         | Signature _____                                                                                                                      | Date _____             |

Please print form and fax to 214-706-1565.

## Change of Authorship Form

---

**(Must be completed and signed by ALL authors)**

Please check all that apply

\_\_\_\_\_ New author(s) have been added (in addition to this form, all new authors must complete the copyright transfer agreement and conflict of interest disclosure.

\_\_\_\_\_ Change in order of authorship.

\_\_\_\_\_ An author wishes to remove his/her name. An author's name may only be removed his/her own request and a letter signed by the author should accompany this form

**Manuscript Number** HYPE2019141 \_\_\_\_\_

**Manuscript Title** Regional patterns and association between obesity and hypertension in Africa: E \_\_\_\_\_

### Former Authorship

Please list ALL AUTHORS in the same order as the original submission. For more than 12, use an extra sheet.

#### Print Name

Name (1) \_\_\_\_\_  
Name (2) \_\_\_\_\_  
Name (3) \_\_\_\_\_  
Name (4) \_\_\_\_\_  
Name (5) \_\_\_\_\_  
Name (6) \_\_\_\_\_

#### Print Name

Name (7) \_\_\_\_\_  
Name (8) \_\_\_\_\_  
Name (9) \_\_\_\_\_  
Name (10) \_\_\_\_\_  
Name (11) \_\_\_\_\_  
Name (12) \_\_\_\_\_

### New Authorship

All authors must sign below agreeing to the changes in authorship. The authorship order must reflect the authorship order of the manuscript.

|           |                    |           |           |      |           |
|-----------|--------------------|-----------|-----------|------|-----------|
| Name (1)  | Shukri Mohamed     | Signature | _____     | Date | _____     |
| Name (2)  | Engelbert Nonterah | Signature | _____     | Date | _____     |
| Name (3)  | Shane Norris       | Signature | _____     | Date | _____     |
| Name (4)  | Hermann Sorgho     | Signature | _____     | Date | _____     |
| Name (5)  | Stephen Tollman,   | Signature | _____     | Date | _____     |
| Name (6)  | Rulan Parekh       | Signature | _____     | Date | _____     |
| Name (7)  | Chisala Chisala    | Signature | _____     | Date | _____     |
| Name (8)  | Kenneth Ekoru      | Signature | _____     | Date | _____     |
| Name (9)  | Salina P. Waddy    | Signature | _____     | Date | _____     |
| Name (10) | Emmanuel Peprah    | Signature | EK Peprah | Date | 1-24-2020 |
| Name (11) | George A. Mensah   | Signature | _____     | Date | _____     |
| Name (12) | Ken Wiley          | Signature | _____     | Date | _____     |

**Please print form and fax to 214-706-1565.**

## Change of Authorship Form

---

(Must be completed and signed by ALL authors)

Please check all that apply

\_\_\_\_\_ New author(s) have been added (in addition to this form, all new authors must complete the copyright transfer agreement and conflict of interest disclosure.

\_\_\_\_\_ Change in order of authorship.

\_\_\_\_\_ An author wishes to remove his/her name. An author's name may only be removed his/her own request and a letter signed by the author should accompany this form

HYPE201914147-T1

Manuscript Number \_\_\_\_\_

Regional patterns and association between obesity and hypertension in Africa: Evidence from the H3Africa CHAIR study

Manuscript Title \_\_\_\_\_

### Former Authorship

Please list ALL AUTHORS in the same order as the original submission. For more than 12, use an extra sheet.

#### Print Name

Name (1) \_\_\_\_\_  
Name (2) \_\_\_\_\_  
Name (3) \_\_\_\_\_  
Name (4) \_\_\_\_\_  
Name (5) \_\_\_\_\_  
Name (6) \_\_\_\_\_

#### Print Name

Name (7) \_\_\_\_\_  
Name (8) \_\_\_\_\_  
Name (9) \_\_\_\_\_  
Name (10) \_\_\_\_\_  
Name (11) \_\_\_\_\_  
Name (12) \_\_\_\_\_

### New Authorship

All authors must sign below agreeing to the changes in authorship. The authorship order must reflect the authorship order of the manuscript.

|           |                    |           |                                                                                     |      |          |
|-----------|--------------------|-----------|-------------------------------------------------------------------------------------|------|----------|
| Name (1)  | Shukri Mohamed     | Signature | _____                                                                               | Date | _____    |
| Name (2)  | Engelbert Nonterah | Signature | _____                                                                               | Date | _____    |
| Name (3)  | Shane Norris       | Signature | _____                                                                               | Date | _____    |
| Name (4)  | Hermann Sorgho     | Signature | _____                                                                               | Date | _____    |
| Name (5)  | Stephen Tollman,   | Signature | _____                                                                               | Date | _____    |
| Name (6)  | Rulan Parekh       | Signature | _____                                                                               | Date | _____    |
| Name (7)  | Chisala Chisala    | Signature | _____                                                                               | Date | _____    |
| Name (8)  | Kenneth Ekoru      | Signature |  | Date | 01-23-20 |
| Name (9)  | Salina P. Waddy    | Signature | _____                                                                               | Date | _____    |
| Name (10) | Emmanuel Peprah    | Signature | _____                                                                               | Date | _____    |
| Name (11) | George A. Mensah   | Signature | _____                                                                               | Date | _____    |
| Name (12) | Ken Wiley          | Signature | _____                                                                               | Date | _____    |

Please print form and fax to 214-706-1565.

## Change of Authorship Form

---

(Must be completed and signed by ALL authors)

Please check all that apply

\_\_\_\_\_ New author(s) have been added (in addition to this form, all new authors must complete the copyright transfer agreement and conflict of interest disclosure.

\_\_\_\_\_ Change in order of authorship.

\_\_\_\_\_ An author wishes to remove his/her name. An author's name may only be removed his/her own request and a letter signed by the author should accompany this form

Manuscript Number HYPE2019141

Manuscript Title Regional patterns and association between obesity and hypertension in Africa: E

### Former Authorship

Please list ALL AUTHORS in the same order as the original submission. For more than 12, use an extra sheet.

#### Print Name

Name (1) \_\_\_\_\_  
Name (2) \_\_\_\_\_  
Name (3) \_\_\_\_\_  
Name (4) \_\_\_\_\_  
Name (5) \_\_\_\_\_  
Name (6) \_\_\_\_\_

#### Print Name

Name (7) \_\_\_\_\_  
Name (8) \_\_\_\_\_  
Name (9) \_\_\_\_\_  
Name (10) \_\_\_\_\_  
Name (11) \_\_\_\_\_  
Name (12) \_\_\_\_\_

### New Authorship

All authors must sign below agreeing to the changes in authorship. The authorship order must reflect the authorship order of the manuscript.

|                                    |                               |                        |
|------------------------------------|-------------------------------|------------------------|
| Name (1) <u>Shukri Mohamed</u>     | Signature _____               | Date _____             |
| Name (2) <u>Engelbert Nonterah</u> | Signature _____               | Date _____             |
| Name (3) <u>Shane Norris</u>       | Signature _____               | Date _____             |
| Name (4) <u>Hermann Sorgho</u>     | Signature _____               | Date _____             |
| Name (5) <u>Stephen Tollman,</u>   | Signature _____               | Date _____             |
| Name (6) <u>Rulan Parekh</u>       | Signature _____               | Date _____             |
| Name (7) <u>Chisala Chisala</u>    | Signature _____               | Date _____             |
| Name (8) <u>Kenneth Ekoru</u>      | Signature _____               | Date _____             |
| Name (9) <u>Salina P. Waddy</u>    | Signature <u>Salina Waddy</u> | Date <u>01/23/2020</u> |
| Name (10) <u>Emmanuel Peprah</u>   | Signature _____               | Date _____             |
| Name (11) <u>George A. Mensah</u>  | Signature _____               | Date _____             |
| Name (12) <u>Ken Wiley</u>         | Signature _____               | Date _____             |

Please print form and fax to 214-706-1565.

## Change of Authorship Form

(Must be completed and signed by ALL authors)

Please check all that apply

\_\_\_\_\_ New author(s) have been added (in addition to this form, all new authors must complete the copyright transfer agreement and conflict of interest disclosure.

\_\_\_\_\_ Change in order of authorship.

\_\_\_\_\_ An author wishes to remove his/her name. An author's name may only be removed his/her own request and a letter signed by the author should accompany this form

HYPE201914147-T1

Manuscript Number \_\_\_\_\_

Regional patterns and association between obesity and hypertension in Africa: Evidence from the H3Africa CHAIR study

Manuscript Title \_\_\_\_\_

### Former Authorship

Please list ALL AUTHORS in the same order as the original submission. For more than 12, use an extra sheet.

#### Print Name

Name (1) \_\_\_\_\_  
Name (2) \_\_\_\_\_  
Name (3) \_\_\_\_\_  
Name (4) \_\_\_\_\_  
Name (5) \_\_\_\_\_  
Name (6) \_\_\_\_\_

#### Print Name

Name (7) \_\_\_\_\_  
Name (8) \_\_\_\_\_  
Name (9) \_\_\_\_\_  
Name (10) \_\_\_\_\_  
Name (11) \_\_\_\_\_  
Name (12) \_\_\_\_\_

### New Authorship

All authors must sign below agreeing to the changes in authorship. The authorship order must reflect the authorship order of the manuscript.

|           |                      |           |                                                                                      |      |            |
|-----------|----------------------|-----------|--------------------------------------------------------------------------------------|------|------------|
| Name (1)  | Shukri Mohamed       | Signature | _____                                                                                | Date | _____      |
| Name (2)  | Engelbert A Nonterah | Signature |  | Date | 24/01/2020 |
| Name (3)  | Shane Norris         | Signature |   | Date | 24/01/20   |
| Name (4)  | Hermann Sorgho       | Signature | _____                                                                                | Date | _____      |
| Name (5)  | Stephen Tollman,     | Signature | _____                                                                                | Date | _____      |
| Name (6)  | Rulan Parekh         | Signature |   | Date | 25/01/2020 |
| Name (7)  | Chisala Chisala      | Signature |   | Date | 28/01/20   |
| Name (8)  | Kenneth Ekoru        | Signature | _____                                                                                | Date | _____      |
| Name (9)  | Salina P. Waddy      | Signature | _____                                                                                | Date | _____      |
| Name (10) | Emmanuel Peprah      | Signature | _____                                                                                | Date | _____      |
| Name (11) | George A. Mensah     | Signature | _____                                                                                | Date | _____      |
| Name (12) | Ken Wiley            | Signature | _____                                                                                | Date | _____      |

Please print form and fax to 214-706-1565.



## Change of Authorship Form

---

(Must be completed and signed by ALL authors)

Please check all that apply

\_\_\_\_\_ New author(s) have been added (in addition to this form, all new authors must complete the copyright transfer agreement and conflict of interest disclosure.

\_\_\_\_\_ Change in order of authorship.

\_\_\_\_\_ An author wishes to remove his/her name. An author's name may only be removed his/her own request and a letter signed by the author should accompany this form

**Manuscript Number** HYPE2019141

**Manuscript Title** Regional patterns and association between obesity and hypertension in Africa: E

### Former Authorship

Please list ALL AUTHORS in the same order as the original submission. For more than 12, use an extra sheet.

#### Print Name

Name (1) \_\_\_\_\_  
Name (2) \_\_\_\_\_  
Name (3) \_\_\_\_\_  
Name (4) \_\_\_\_\_  
Name (5) \_\_\_\_\_  
Name (6) \_\_\_\_\_

#### Print Name

Name (7) \_\_\_\_\_  
Name (8) \_\_\_\_\_  
Name (9) \_\_\_\_\_  
Name (10) \_\_\_\_\_  
Name (11) \_\_\_\_\_  
Name (12) \_\_\_\_\_

### New Authorship

All authors must sign below agreeing to the changes in authorship. The authorship order must reflect the authorship order of the manuscript.

|                                   |                            |                       |
|-----------------------------------|----------------------------|-----------------------|
| Name (1) <u>Jennifer Troyer</u>   | Signature _____            | Date _____            |
| Name (2) <u>Michèle Ramsay,</u>   | Signature <u>M. Ramsay</u> | Date <u>25Jan2020</u> |
| Name (3) <u>Mayowa O. Owolabi</u> | Signature _____            | Date _____            |
| Name (4) _____                    | Signature _____            | Date _____            |
| Name (5) _____                    | Signature _____            | Date _____            |
| Name (6) _____                    | Signature _____            | Date _____            |
| Name (7) _____                    | Signature _____            | Date _____            |
| Name (8) _____                    | Signature _____            | Date _____            |
| Name (9) _____                    | Signature _____            | Date _____            |
| Name (10) _____                   | Signature _____            | Date _____            |
| Name (11) _____                   | Signature _____            | Date _____            |
| Name (12) _____                   | Signature _____            | Date _____            |

Please print form and fax to 214-706-1565.

## Change of Authorship Form

---

(Must be completed and signed by ALL authors)

Please check all that apply

\_\_\_\_\_ New author(s) have been added (in addition to this form, all new authors must complete the copyright transfer agreement and conflict of interest disclosure.

\_\_\_\_\_ Change in order of authorship.

\_\_\_\_\_ An author wishes to remove his/her name. An author's name may only be removed his/her own request and a letter signed by the author should accompany this form

Manuscript Number HYPE2019141

Manuscript Title Regional patterns and association between obesity and hypertension in Africa: E

### Former Authorship

Please list ALL AUTHORS in the same order as the original submission. For more than 12, use an extra sheet.

#### Print Name

Name (1) \_\_\_\_\_  
Name (2) \_\_\_\_\_  
Name (3) \_\_\_\_\_  
Name (4) \_\_\_\_\_  
Name (5) \_\_\_\_\_  
Name (6) \_\_\_\_\_

#### Print Name

Name (7) \_\_\_\_\_  
Name (8) \_\_\_\_\_  
Name (9) \_\_\_\_\_  
Name (10) \_\_\_\_\_  
Name (11) \_\_\_\_\_  
Name (12) \_\_\_\_\_

### New Authorship

All authors must sign below agreeing to the changes in authorship. The authorship order must reflect the authorship order of the manuscript.

|                                   |                                         |            |
|-----------------------------------|-----------------------------------------|------------|
| Name (1) <u>Jennifer Troyer</u>   | Signature <u><i>Jennifer Troyer</i></u> | Date _____ |
| Name (2) <u>Michèle Ramsay,</u>   | Signature _____                         | Date _____ |
| Name (3) <u>Mayowa O. Owolabi</u> | Signature _____                         | Date _____ |
| Name (4) _____                    | Signature _____                         | Date _____ |
| Name (5) _____                    | Signature _____                         | Date _____ |
| Name (6) _____                    | Signature _____                         | Date _____ |
| Name (7) _____                    | Signature _____                         | Date _____ |
| Name (8) _____                    | Signature _____                         | Date _____ |
| Name (9) _____                    | Signature _____                         | Date _____ |
| Name (10) _____                   | Signature _____                         | Date _____ |
| Name (11) _____                   | Signature _____                         | Date _____ |
| Name (12) _____                   | Signature _____                         | Date _____ |

Please print form and fax to 214-706-1565.

## Change of Authorship Form

---

(Must be completed and signed by ALL authors)

Please check all that apply

\_\_\_\_\_ New author(s) have been added (in addition to this form, all new authors must complete the copyright transfer agreement and conflict of interest disclosure.

\_\_\_\_\_ Change in order of authorship.

\_\_\_\_\_ An author wishes to remove his/her name. An author's name may only be removed his/her own request and a letter signed by the author should accompany this form

Manuscript Number HYPE2019141

Manuscript Title Regional patterns and association between obesity and hypertension in Africa: E

### Former Authorship

Please list ALL AUTHORS in the same order as the original submission. For more than 12, use an extra sheet.

#### Print Name

Name (1) \_\_\_\_\_  
Name (2) \_\_\_\_\_  
Name (3) \_\_\_\_\_  
Name (4) \_\_\_\_\_  
Name (5) \_\_\_\_\_  
Name (6) \_\_\_\_\_

#### Print Name

Name (7) \_\_\_\_\_  
Name (8) \_\_\_\_\_  
Name (9) \_\_\_\_\_  
Name (10) \_\_\_\_\_  
Name (11) \_\_\_\_\_  
Name (12) \_\_\_\_\_

### New Authorship

All authors must sign below agreeing to the changes in authorship. The authorship order must reflect the authorship order of the manuscript.

|                                   |                                 |                       |
|-----------------------------------|---------------------------------|-----------------------|
| Name (1) <u>Jennifer Troyer</u>   | Signature _____                 | Date _____            |
| Name (2) <u>Michèle Ramsay,</u>   | Signature _____                 | Date _____            |
| Name (3) <u>Mayowa O. Owolabi</u> | Signature <u>Mayowa Owolabi</u> | Date <u>230102020</u> |
| Name (4) _____                    | Signature _____                 | Date _____            |
| Name (5) _____                    | Signature _____                 | Date _____            |
| Name (6) _____                    | Signature _____                 | Date _____            |
| Name (7) _____                    | Signature _____                 | Date _____            |
| Name (8) _____                    | Signature _____                 | Date _____            |
| Name (9) _____                    | Signature _____                 | Date _____            |
| Name (10) _____                   | Signature _____                 | Date _____            |
| Name (11) _____                   | Signature _____                 | Date _____            |
| Name (12) _____                   | Signature _____                 | Date _____            |

Please print form and fax to 214-706-1565.
